# Supplementary material
Source: publisher figshare collection journal article supplement (https://geolsoc.figshare.com/ndownloader/files/14810975)
Supplement: Supplementary file 1 [file 14810975]

## Sheet: Thickness and facies
Formation	ID	Location	Co-Ordinates	Log number	Thickness	Facies type
Neslen	7118	CC3	N 39'02.805 W 109'08.537	CC3.2	1.6	Fsm
Neslen	7118	CC3	N 39'02.805 W 109'08.537	CC3.2	1.6	Sm
Neslen	7119	CC3	N 39'02.805 W 109'08.537	CC3.2	0.4	Sd
Neslen	7119	CC3	N 39'02.805 W 109'08.537	CC3.2	1.2	Sm
Neslen	7120	CC3	N 39'02.805 W 109'08.537	CC3.2	0.7	Fsm
Neslen	7120	CC3	N 39'02.805 W 109'08.537	CC3.2	0.3	Sd
Neslen	7121	CC3	N 39'02.805 W 109'08.537	CC3.2	1.4	Fsm
Neslen	7121	CC3	N 39'02.805 W 109'08.537	CC3.2	0.3	Sd
Neslen	7122	CC3	N 39'02.805 W 109'08.537	CC3.2	0.7	Fl
Neslen	7123	CC3	N 39'02.805 W 109'08.537	CC3.2	0.3	Fsm
Neslen	7123	CC3	N 39'02.805 W 109'08.537	CC3.2	0.3	Fsm
Neslen	7123	CC3	N 39'02.805 W 109'08.537	CC3.2	2	Sm
Neslen	7124	CC3	N 39'02.805 W 109'08.537	CC3.2	0.4	Fl
Neslen	7125	CC3	N 39'02.805 W 109'08.537	CC3.2	0.9	Fsm
Neslen	7125	CC3	N 39'02.805 W 109'08.537	CC3.2	0.6	Fsm
Neslen	7125	CC3	N 39'02.805 W 109'08.537	CC3.2	0.5	Fsm
Neslen	7126	CC3	N 39'02.805 W 109'08.537	CC3.2	1.15	Fsm
Neslen	7126	CC3	N 39'02.805 W 109'08.537	CC3.2	0.25	Sd
Neslen	7127	CC3	N 39'02.805 W 109'08.537	CC3.2	1.2	Fsm
Neslen	7127	CC3	N 39'02.805 W 109'08.537	CC3.2	0.9	Sm
Neslen	7128	CC3	N 39'02.805 W 109'08.537	CC3.2	0.6	Fl
Neslen	7129	CC3	N 39'02.805 W 109'08.537	CC3.2	0.4	Sr
Neslen	7129	CC3	N 39'02.805 W 109'08.537	CC3.2	0.3	Sm
Neslen	7130	CC3	N 39'02.805 W 109'08.537	CC3.2	0.7	Fl
Neslen	7131	CC3	N 39'02.805 W 109'08.537	CC3.2	1.1	Fsm
Neslen	7131	CC3	N 39'02.805 W 109'08.537	CC3.2	0.4	Sr
Neslen	7132	CC3	N 39'02.805 W 109'08.537	CC3.2	0.3	Fsm
Neslen	7132	CC3	N 39'02.805 W 109'08.537	CC3.2	0.2	Sm
Neslen	7133	CC3	N 39'02.805 W 109'08.537	CC3.2	0.5	Fsm
Neslen	7133	CC3	N 39'02.805 W 109'08.537	CC3.2	1.3	Sm
Neslen	7134	CC3	N 39'02.805 W 109'08.537	CC3.2	0.4	Sr
Neslen	7135	CC3	N 39'02.805 W 109'08.537	CC3.2	0.6	Sr
Neslen	7136	CC3	N 39'02.805 W 109'08.537	CC3.2	0.5	Sr
Neslen	7137	CC3	N 39'02.805 W 109'08.537	CC3.2	0.3	Sr
Neslen	7138	CC3	N 39'02.805 W 109'08.537	CC3.2	0.2	Sr
Neslen	7139	CC3	N 39'02.805 W 109'08.537	CC3.2	0.5	Sm
Neslen	7140	CC3	N 39'02.805 W 109'08.537	CC3.2	0.4	Sm
Neslen	7141	CC3	N 39'02.805 W 109'08.537	CC3.2	0.5	Sm
Neslen	7142	CC3	N 39'02.805 W 109'08.537	CC3.2	0.9	Sm
Neslen	7118	CC3	N 39'02.805 W 109'08.537	CC3.2	1.7	Fsm
Neslen	7118	CC3	N 39'02.805 W 109'08.537	CC3.2	1.5	Sr
Neslen	7118	CC3	N 39'02.805 W 109'08.537	CC3.2	0.4	Sp
Neslen	7119	CC3	N 39'02.805 W 109'08.537	CC3.2	1.1	Fsm
Neslen	7119	CC3	N 39'02.805 W 109'08.537	CC3.2	0.5	Sd
Neslen	7120	CC3	N 39'02.805 W 109'08.537	CC3.2	0.5	Sd
Neslen	7122	CC3	N 39'02.805 W 109'08.537	CC3.2	0.7	Fl
Neslen	7118	CC3	N 39'01'43.66 W 109'48'01.75	CC3.1	1.7	Sr
Neslen	7119	CC3	N 39'01'43.66 W 109'48'01.75	CC3.1	0.8	Fsm
Neslen	7119	CC3	N 39'01'43.66 W 109'48'01.75	CC3.1	0.9	Sm
Neslen	7120	CC3	N 39'01'43.66 W 109'48'01.75	CC3.1	0.7	Sd
Neslen	7124	CC3	N 39'01'43.66 W 109'48'01.75	CC3.1	0.7	Fl
Neslen	7121	CC3	N 39'01'43.66 W 109'48'01.75	CC3.1	0.5	Sd
Neslen	7128	CC3	N 39'01'43.66 W 109'48'01.75	CC3.1	0.6	Fl
Neslen	7143	CC3	N 39'01'43.66 W 109'48'01.75	CC3.1	0.5	Fsm
Neslen	7143	CC3	N 39'01'43.66 W 109'48'01.75	CC3.1	0.7	Sd
Neslen	7123	CC3	N 39'01'43.66 W 109'48'01.75	CC3.1	1.8	Sr
Neslen	7144	CC3	N 39'01'43.66 W 109'48'01.75	CC3.1	0.5	Fsm
Neslen	7144	CC3	N 39'01'43.66 W 109'48'01.75	CC3.1	0.5	Sd
Neslen	7145	CC3	N 39'01'43.66 W 109'48'01.75	CC3.1	0.4	Fsm
Neslen	7145	CC3	N 39'01'43.66 W 109'48'01.75	CC3.1	0.3	Sd
Neslen	7146	CC3	N 39'01'43.66 W 109'48'01.75	CC3.1	0.7	Fsm
Neslen	7146	CC3	N 39'01'43.66 W 109'48'01.75	CC3.1	0.4	Sd
Neslen	7127	CC3	N 39'01'43.66 W 109'48'01.75	CC3.1	0.5	Sd
Neslen	7127	CC3	N 39'01'43.66 W 109'48'01.75	CC3.1	0.7	Sm
Neslen	7147	CC3	N 39'01'43.66 W 109'48'01.75	CC3.1	0.4	Fsm
Neslen	7147	CC3	N 39'01'43.66 W 109'48'01.75	CC3.1	0.4	Sd
Neslen	7148	CC3	N 39'01'43.66 W 109'48'01.75	CC3.1	0.5	Sm
Neslen	7129	CC3	N 39'01'43.66 W 109'48'01.75	CC3.1	0.9	Fsm
Neslen	7129	CC3	N 39'01'43.66 W 109'48'01.75	CC3.1	0.6	Sm
Neslen	7143	CC3	N 39'0143.33 W 109'48'03.33	CC3.4	1.7	Fsm
Neslen	7143	CC3	N 39'0143.33 W 109'48'03.33	CC3.4	0.5	Sd
Neslen	7144	CC3	N 39'0143.33 W 109'48'03.33	CC3.4	0.6	Fsm
Neslen	7144	CC3	N 39'0143.33 W 109'48'03.33	CC3.4	0.25	Sd
Neslen	7145	CC3	N 39'0143.33 W 109'48'03.33	CC3.4	0.3	Fsm
Neslen	7145	CC3	N 39'0143.33 W 109'48'03.33	CC3.4	0.4	Sd
Neslen	7148	CC3	N 39'0143.33 W 109'48'03.33	CC3.4	0.2	Sd
Neslen	7147	CC3	N 39'0143.33 W 109'48'03.33	CC3.4	0.6	Fsm
Neslen	7147	CC3	N 39'0143.33 W 109'48'03.33	CC3.4	0.5	Sd
Neslen	7127	CC3	N 39'0143.33 W 109'48'03.33	CC3.4	0.5	Fsm
Neslen	7127	CC3	N 39'0143.33 W 109'48'03.33	CC3.4	0.7	Sr
Neslen	7146	CC3	N 39'0143.33 W 109'48'03.33	CC3.4	0.5	Fsm
Neslen	7146	CC3	N 39'0143.33 W 109'48'03.33	CC3.4	0.4	Sd
Neslen	7129	CC3	N 39'0143.33 W 109'48'03.33	CC3.4	0.9	Fsm
Neslen	7129	CC3	N 39'0143.33 W 109'48'03.33	CC3.4	0.6	Sm
Neslen	7148	CC3	N 39'0143.33 W 109'48'03.33	CC3.4	0.5	Fl
Neslen	7149	CC3	N 39'0143.33 W 109'48'03.33	CC3.4	2	Sr
Neslen	7149	CC3	N 39'0143.33 W 109'48'03.33	CC3.4	1	Sr
Neslen	7149	CC3	N 39'0143.33 W 109'48'03.33	CC3.4	1.5	Sp
Neslen	7149	CC3	N 39'0143.33 W 109'48'03.33	CC3.4	2	Sp
Neslen	7149	CC3	N 39'0143.33 W 109'48'03.33	CC3.4	1.5	Sp
Neslen	7143	CC3	N 39'01'42.64 W 109'48'04.17	CC3.5	1.4	Fsm
Neslen	7143	CC3	N 39'01'42.64 W 109'48'04.17	CC3.5	0.7	Sr
Neslen	7144	CC3	N 39'01'42.64 W 109'48'04.17	CC3.5	1.3	Fsm
Neslen	7127	CC3	N 39'01'42.64 W 109'48'04.17	CC3.5	0.6	Sd
Neslen	7146	CC3	N 39'01'42.64 W 109'48'04.17	CC3.5	0.4	Fsm
Neslen	7146	CC3	N 39'01'42.64 W 109'48'04.17	CC3.5	0.6	Sd
Neslen	7145	CC3	N 39'01'42.64 W 109'48'04.17	CC3.5	0.2	Fsm
Neslen	7145	CC3	N 39'01'42.64 W 109'48'04.17	CC3.5	0.4	Sd
Neslen	7150	CC3	N 39'01'42.64 W 109'48'04.17	CC3.5	0.6	Fl
Neslen	7148	CC3	N 39'01'42.64 W 109'48'04.17	CC3.5	0.4	Fl
Neslen	7151	CC3	N 39'01'42.64 W 109'48'04.17	CC3.5	0.5	Fl
Neslen	7147	CC3	N 39'01'42.64 W 109'48'04.17	CC3.5	0.5	Sd
Neslen	7152	CC3	N 39'01'42.64 W 109'48'04.17	CC3.5	6	St
Neslen	7153	TSR1	N 39'10.328 W 110'03.170	tsr.1	0.4	C
Neslen	7153	TSR1	N 39'10.328 W 110'03.170	tsr.1	0.1	Fl
Neslen	7154	TSR1	N 39'10.328 W 110'03.170	tsr.1	0.6	Fsm
Neslen	7154	TSR1	N 39'10.328 W 110'03.170	tsr.1	1	Fsm
Neslen	7154	TSR1	N 39'10.328 W 110'03.170	tsr.1	0.2	Fsm
Neslen	7154	TSR1	N 39'10.328 W 110'03.170	tsr.1	0.6	Fsm
Neslen	7155	TSR1	N 39'10.328 W 110'03.170	tsr.1	1.1	Sd
Neslen	7156	TSR1	N 39'10.328 W 110'03.170	tsr.1	0.6	Fsm
Neslen	7157	TSR1	N 39'10.328 W 110'03.170	tsr.1	0.7	Sd
Neslen	7157	TSR1	N 39'10.328 W 110'03.170	tsr.1	2.3	Sd
Neslen	7158	TSR1	N 39'10.328 W 110'03.170	tsr.1	0.3	Fl
Neslen	7159	TSR1	N 39'10.328 W 110'03.170	tsr.1	3	Sm
Neslen	7160	TSR1	N 39'10.328 W 110'03.170	tsr.1	0.6	Fl
Neslen	7160	TSR1	N 39'10.328 W 110'03.170	tsr.1	0.7	Fl
Neslen	7160	TSR1	N 39'10.328 W 110'03.170	tsr.1	0.2	Fl
Neslen	7161	TSR1	N 39'10.328 W 110'03.170	tsr.1	2	Sm
Neslen	7162	TSR1	N 39'10.328 W 110'03.170	tsr.1	4	Sp
Neslen	7159	TSR1	N 39'10.349 W 110'03.133	tsr.2	1.5	Sr
Neslen	7163	TSR1	N 39'10.349 W 110'03.133	tsr.2	0.65	Sd
Neslen	7164	TSR1	N 39'10.349 W 110'03.133	tsr.2	1.2	Fl
Neslen	7164	TSR1	N 39'103.78 W 110'031.13	tsr.3	0.75	Fl
Neslen	7161	TSR1	N 39'103.78 W 110'031.13	tsr.3	1.5	Sm
Neslen	7160	TSR1	N 39'103.78 W 110'031.13	tsr.3	0.4	Fl
Neslen	7159	TSR1	N 39'103.78 W 110'031.13	tsr.3	0.9	Sd
Neslen	7159	TSR1	N 39'103.78 W 110'031.13	tsr.3	1.6	Sd
Neslen	7163	TSR1	N 39'103.78 W 110'031.13	tsr.3	1	Sd
Neslen	7165	TSR1	N 39'103.78 W 110'031.13	tsr.3	0.45	Fsm
Neslen	7164	TSR1	N 39'103.78 W 110'031.13	tsr.3	0.75	Fl
Neslen	7161	TSR1	N 39'103.83 W 110'031.09	tsr.4	1.3	Sm
Neslen	7160	TSR1	N 39'103.83 W 110'031.09	tsr.4	0.3	Fl
Neslen	7159	TSR1	N 39'103.83 W 110'031.09	tsr.4	0.4	Sd
Neslen	7159	TSR1	N 39'103.83 W 110'031.09	tsr.4	0.6	Sr
Neslen	7163	TSR1	N 39'103.83 W 110'031.09	tsr.4	0.8	Sd
Neslen	7165	TSR1	N 39'103.83 W 110'031.09	tsr.4	0.3	Sd
Neslen	7164	TSR1	N 39'103.83 W 110'031.09	tsr.4	0.4	Fl
Neslen	7155	TSR1	N 39'103.83 W 110'031.09	tsr.4	0.6	Sd
Neslen	7166	TSR1	N 39'103.83 W 110'031.09	tsr.4	0.4	Fl
Neslen	7156	TSR1	N 39'103.83 W 110'031.09	tsr.4	1.1	Sd
Neslen	7156	TSR1	N 39'103.83 W 110'031.09	tsr.4	2.4	Sd
Neslen	7156	TSR1	N 39'103.83 W 110'031.09	tsr.4	0.3	Sd
Neslen	7168	TSR1	N 39'103.83 W 110'031.09	tsr.4	0.7	Fl
Neslen	7157	TSR1	N 39'103.83 W 110'031.09	tsr.4	0.4	Fsm
Neslen	7157	TSR1	N 39'103.83 W 110'031.09	tsr.4	1.4	Sd
Neslen	7162	TSR1	N 39'103.92 W 110'030.78	tsr.5	2.1	Sr
Neslen	7162	TSR1	N 39'103.92 W 110'030.78	tsr.5	0.8	Sr
Neslen	7161	TSR1	N 39'103.92 W 110'030.78	tsr.5	0.9	Fsm
Neslen	7161	TSR1	N 39'103.92 W 110'030.78	tsr.5	1.4	Sr
Neslen	7170	TSR1	N 39'103.92 W 110'030.78	tsr.5	0.5	Fl
Neslen	7159	TSR1	N 39'103.92 W 110'030.78	tsr.5	0.4	Sd
Neslen	7163	TSR1	N 39'103.92 W 110'030.78	tsr.5	0.5	Fsm
Neslen	7163	TSR1	N 39'103.92 W 110'030.78	tsr.5	0.5	Sd
Neslen	7164	TSR1	N 39'103.92 W 110'030.78	tsr.5	0.7	Fl
Neslen	7165	TSR1	N 39'103.92 W 110'030.78	tsr.5	1.1	Sd
Neslen	7162	TSR1	N 39'104.29 W 110'030.19	tsr.6	3	Sp
Neslen	7161	TSR1	N 39'104.29 W 110'030.19	tsr.6	1	Sd
Neslen	7171	TSR1	N 39'104.29 W 110'030.19	tsr.6	0.5	Fl
Neslen	7159	TSR1	N 39'104.29 W 110'030.19	tsr.6	0.3	Fsm
Neslen	7159	TSR1	N 39'104.29 W 110'030.19	tsr.6	0.4	Fsm
Neslen	7159	TSR1	N 39'104.29 W 110'030.19	tsr.6	1	Sd
Neslen	7164	TSR1	N 39'104.29 W 110'030.19	tsr.6	0.8	Fl
Neslen	7165	TSR1	N 39'104.29 W 110'030.19	tsr.6	0.8	Fsm
Neslen	7165	TSR1	N 39'104.29 W 110'030.19	tsr.6	0.7	Sd
Neslen	7156	TSR1	N 39'104.29 W 110'030.19	tsr.6	0.4	Fsm
Neslen	7156	TSR1	N 39'104.29 W 110'030.19	tsr.6	0.8	Sd
Neslen	7168	TSR1	N 39'104.29 W 110'030.19	tsr.6	0.8	Fl
Neslen	7172	TSR1	N 39'104.29 W 110'030.19	tsr.6	0.8	Fsm
Neslen	7161	TSR1	N 39'105.20 W 110'031.10	tsr.7	2	Sm
Neslen	7161	TSR1	N 39'105.20 W 110'031.10	tsr.7	0.4	Sd
Neslen	7160	TSR1	N 39'105.20 W 110'031.10	tsr.7	0.4	Fl
Neslen	7159	TSR1	N 39'105.20 W 110'031.10	tsr.7	0.5	Fsm
Neslen	7159	TSR1	N 39'105.20 W 110'031.10	tsr.7	0.9	Sd
Neslen	7163	TSR1	N 39'105.20 W 110'031.10	tsr.7	1.1	Fsm
Neslen	7163	TSR1	N 39'105.20 W 110'031.10	tsr.7	0.4	Sd
Neslen	7164	TSR1	N 39'105.20 W 110'031.10	tsr.7	0.4	Fl
Neslen	7165	TSR1	N 39'105.20 W 110'031.10	tsr.7	0.3	Fsm
Neslen	7165	TSR1	N 39'105.20 W 110'031.10	tsr.7	2.4	Sd
Neslen	7171	TSR1	N 39'105.57 W 110'030.58	tsr.8	1	Sd
Neslen	7160	TSR1	N 39'105.57 W 110'030.58	tsr.8	0.6	Fl
Neslen	7159	TSR1	N 39'105.57 W 110'030.58	tsr.8	0.6	Sd
Neslen	7173	TSR1	N 39'105.57 W 110'030.58	tsr.8	0.5	Fsm
Neslen	7174	TSR1	N 39'105.57 W 110'030.58	tsr.8	0.5	Fl
Neslen	7163	TSR1	N 39'105.57 W 110'030.58	tsr.8	0.8	Sd
Neslen	7165	TSR1	N 39'105.57 W 110'030.58	tsr.8	1	Fsm
Neslen	7165	TSR1	N 39'105.57 W 110'030.58	tsr.8	1	Sd
Neslen	7171	TSR1	N 39'105.61 W110029.70	tsr.9	0.6	Fsm
Neslen	7159	TSR1	N 39'105.61 W110029.70	tsr.9	0.2	Sd
Neslen	7173	TSR1	N 39'105.61 W110029.70	tsr.9	0.4	Fsm
Neslen	7173	TSR1	N 39'105.61 W110029.70	tsr.9	0.2	Sd
Neslen	7174	TSR1	N 39'105.61 W110029.70	tsr.9	0.3	Fl
Neslen	7163	TSR1	N 39'105.61 W110029.70	tsr.9	0.4	Fsm
Neslen	7165	TSR1	N 39'105.61 W110029.70	tsr.9	2.4	Sd
Neslen	7165	TSR1	N 39'105.61 W110029.70	tsr.9	1.5	Sr
Neslen	7156	TSR1	N 39'105.61 W110029.70	tsr.9	0.7	Fsm
Neslen	7172	TSR1	N 39'105.61 W110029.70	tsr.9	1	Fsm
Neslen	7172	TSR1	N 39'105.61 W110029.70	tsr.9	1.3	Sr
Neslen	7153	TSR1	N 39'105.61 W110029.70	tsr.9	0.3	Fl
Neslen	7153	TSR1	N 39'105.61 W110029.70	tsr.9	0.5	C
Neslen	7175	TSR1	N 39.105.64 W 110'029.59	tsr.10	4	St
Neslen	7175	TSR1	N 39.105.64 W 110'029.59	tsr.10	1.5	St
Neslen	7175	TSR1	N 39.105.64 W 110'029.59	tsr.10	0.4	Fm
Neslen	7175	TSR1	N 39.105.64 W 110'029.59	tsr.10	3	St
Neslen	7161	TSR1	N 39.105.64 W 110'029.59	tsr.10	0.3	Fsm
Neslen	7173	TSR1	N 39.105.64 W 110'029.59	tsr.10	2.1	Fsm
Neslen	7165	TSR1	N 39.105.64 W 110'029.59	tsr.10	1.2	Sd
Neslen	7165	TSR1	N 39.105.64 W 110'029.59	tsr.10	2.5	Sr
Neslen	7165	TSR1	N 39.105.64 W 110'029.59	tsr.10	0.3	Fsm
Neslen	7165	TSR1	N 39.105.64 W 110'029.59	tsr.10	1.5	Sd
Neslen	7156	TSR1	N 39.105.64 W 110'029.59	tsr.10	1.2	Fsm
Neslen	7172	TSR1	N 39.105.64 W 110'029.59	tsr.10	0.5	Fsm
Neslen	7153	TSR1	N 39.105.64 W 110'029.59	tsr.10	1	C
Neslen	7153	TSR1	N 39'105.82 W 110'028.90	tsr.11	0.9	C
Neslen	7172	TSR1	N 39'105.82 W 110'028.90	tsr.11	0.4	Fsm
Neslen	7172	TSR1	N 39'105.82 W 110'028.90	tsr.11	0.2	Sd
Neslen	7176	TSR1	N 39'105.82 W 110'028.90	tsr.11	2.3	Sp
Neslen	7176	TSR1	N 39'105.82 W 110'028.90	tsr.11	3.2	Sp
Neslen	7177	CC4	N 39'03368 W 109'80.016	cc4.2	0.9	Sr
Neslen	7177	CC4	N 39'03368 W 109'80.016	cc4.2	0.3	Sm
Neslen	7178	CC4	N 39'03368 W 109'80.016	cc4.2	0.4	Fsm
Neslen	7178	CC4	N 39'03368 W 109'80.016	cc4.2	1	Sr
Neslen	7178	CC4	N 39'03300 W 109'80.000	cc4.1	0.6	Fsm
Neslen	7178	CC4	N 39'03300 W 109'80.000	cc4.1	1.5	Sr
Neslen	7179	CC4	N 39'03300 W 109'80.000	cc4.1	0.25	Fl
Neslen	7177	CC4	N 39'03300 W 109'80.000	cc4.1	1.4	Sr
Neslen	7177	CC4	N 39'03407 W 109'79.994	cc4.a	0.3	Sd
Neslen	7178	CC4	N 39'03407 W 109'79.994	cc4.a	0.5	Sm
Neslen	7177	CC4	N 39'02'01.95 W 109'48'00.28	cc4.b	0.3	Sr
Neslen	7177	CC4	N 39'02'01.95 W 109'48'00.28	cc4.b	0.8	Sm
Castlegate	7180	FLY	N 39'01.544 W 109'84.454	fly.1	3.1	Sp
Castlegate	7180	FLY	N 39'01.544 W 109'84.454	fly.1	1.6	Sr
Castlegate	7181	FLY	N 39'01.544 W 109'84.454	fly.1	0.4	Fsm
Castlegate	7181	FLY	N 39'01.544 W 109'84.454	fly.1	0.6	Sr
Castlegate	7182	FLY	N 39'01.544 W 109'84.454	fly.1	1	Fsm
Castlegate	7182	FLY	N 39'01.544 W 109'84.454	fly.1	0.6	Sd
Castlegate	7183	FLY	N 39'01.544 W 109'84.454	fly.1	0.6	Fl
Castlegate	7184	FLY	N 39'01.544 W 109'84.454	fly.1	0.5	Sd
Castlegate	7183	FLY	N 39'01.776 W 109'86.891	fly.2	0.7	Fl
Castlegate	7184	FLY	N 39'01.776 W 109'86.891	fly.2	0.25	Sd
Castlegate	7180	FLY	N 39'01.776 W 109'86.891	fly.2	1.3	Sp
Castlegate	7180	FLY	N 39'01.776 W 109'86.891	fly.2	0.6	Sd
Castlegate	7180	FLY	N 39'01.776 W 109'86.891	fly.2	0.8	Sr
Castlegate	7185	FLY	N 39'01.525 W 109'84.564	fly.6	9.1	Sr
Castlegate	7186	FLY	N 39'01.525 W 109'84.564	fly.6	0.6	Fr
Castlegate	7187	FLY	N 39'01.525 W 109'84.564	fly.6	0.6	Sp
Castlegate	7188	FLY	N 39'01.525 W 109'84.564	fly.6	0.2	Fr
Castlegate	7189	FLY	N 39'01.525 W 109'84.564	fly.6	0.2	Fsm
Castlegate	7189	FLY	N 39'01.525 W 109'84.564	fly.6	0.7	Sd
Castlegate	7189	FLY	N 39'01.525 W 109'84.564	fly.6	1.7	Sd
Castlegate	7190	FLY	N 39'01.525 W 109'84.564	fly.6	0.4	Fr
Castlegate	7187	FLY	N 39.01.554 W 109'84.659	fly.7	1	Fsm
Castlegate	7187	FLY	N 39.01.554 W 109'84.659	fly.7	1	Sd
Castlegate	7189	FLY	N 39.01.554 W 109'84.659	fly.7	0.6	Fsm
Castlegate	7189	FLY	N 39.01.554 W 109'84.659	fly.7	0.6	Sd
Castlegate	7189	FLY	N 39.01.554 W 109'84.659	fly.7	1.8	Sr
Castlegate	7169	FLY	N 39'01.558 W 109'84.639	fly.8	1.6	Sd
Castlegate	7169	FLY	N 39'01.558 W 109'84.639	fly.8	0.2	Sr
Castlegate	7169	FLY	N 39'01.558 W 109'84.639	fly.8	0.5	Sr
Castlegate	7169	FLY	N 39'01.558 W 109'84.639	fly.8	0.3	Sr
Castlegate	7169	FLY	N 39'01.558 W 109'84.639	fly.8	0.4	Sr
Castlegate	7169	FLY	N 39'01.558 W 109'84.639	fly.8	0.2	Sr
Castlegate	7169	FLY	N 39'01.558 W 109'84.639	fly.8	0.35	Sr
Castlegate	7169	FLY	N 39'01.558 W 109'84.639	fly.8	0.2	Sr
Castlegate	7169	FLY	N 39'01.558 W 109'84.639	fly.8	0.1	Sr
Castlegate	7169	FLY	N 39'01.558 W 109'84.639	fly.8	0.2	Sr
Castlegate	7169	FLY	N 39'01.558 W 109'84.639	fly.8	0.5	Sr
Castlegate	7169	FLY	N 39'01.558 W 109'84.639	fly.8	0.2	Sr
Castlegate	7169	FLY	N 39'01.558 W 109'84.639	fly.8	0.1	Sr
Castlegate	7169	FLY	N 39'01.558 W 109'84.639	fly.8	0.3	Sr
Castlegate	7169	FLY	N 39'01.558 W 109'84.639	fly.8	0.3	Sr
Castlegate	7169	FLY	N 39'01.558 W 109'84.639	fly.8	0.2	Sr
Castlegate	7189	FLY	N 39'01.558 W 109'84.639	fly.8	0.4	Sd
Castlegate	7189	FLY	N 39'01.558 W 109'84.639	fly.8	0.9	Sr
Castlegate	7169	FLY	N 39'00'55.67 W 109'50'41.51	fly.11	2.5	Sr
Castlegate	7186	FLY	N 39'00'55.67 W 109'50'41.51	fly.11	2.2	Fl
Castlegate	7187	FLY	N 39'00'55.67 W 109'50'41.51	fly.11	0.4	Sd
Castlegate	7188	FLY	N 39'00'55.67 W 109'50'41.51	fly.11	0.6	Fl
Castlegate	7189	FLY	N 39'00'55.67 W 109'50'41.51	fly.11	0.4	Sd
Castlegate	7191	FLY	N 39'00'55.67 W 109'50'41.51	fly.11	1.6	Fl
Castlegate	7180	FLY	N 39'00'55.67 W 109'50'41.51	fly.11	1.8	Sp
Castlegate	7184	FLY	N 39'00'55.67 W 109'50'41.51	fly.11	1.4	Sr
Castlegate	7192	HRS	N 39'004.73 W 109'94.435	hrs.4	4.5	Sp
Castlegate	7192	HRS	N 39'004.34 W 109'94.353	hrs.2	0.5	Sr
Castlegate	7194	HRS	N 39'004.34 W 109'94.353	hrs.2	0.4	Fl
Castlegate	7195	HRS	N 39'004.34 W 109'94.353	hrs.2	0.8	Sd
Castlegate	7196	HRS	N 39'004.34 W 109'94.353	hrs.2	0.7	Fsm
Castlegate	7196	HRS	N 39'004.34 W 109'94.353	hrs.2	1.5	Sd
Castlegate	7197	HRS	N 39'004.34 W 109'94.353	hrs.2	1.1	Fsm
Castlegate	7197	HRS	N 39'004.34 W 109'94.353	hrs.2	0.4	Sd
Castlegate	7195	HRS	N 39'00.479 W 109'94.383	hrs.3	0.5	Fsm
Castlegate	7195	HRS	N 39'00.479 W 109'94.383	hrs.3	1.2	Fsm
Castlegate	7195	HRS	N 39'00.479 W 109'94.383	hrs.3	0.7	Sm
Castlegate	7196	HRS	N 39'00.479 W 109'94.383	hrs.3	0.8	Fsm
Castlegate	7196	HRS	N 39'00.479 W 109'94.383	hrs.3	0.9	Sd
Castlegate	7198	HRS	N 39'00.479 W 109'94.383	hrs.3	0.5	Fl
Castlegate	7197	HRS	N 39'00.479 W 109'94.383	hrs.3	2.1	Fsm
Castlegate	7197	HRS	N 39'00.479 W 109'94.383	hrs.3	0.6	Sr
Castlegate	7199	HRS	N 39'00.479 W 109'94.383	hrs.3	1.3	Fl
Castlegate	7200	HRS	N 39'00.479 W 109'94.383	hrs.3	0.6	Sr
Castlegate	7201	HRS	N 39'00.479 W 109'94.383	hrs.3	2.9	Sr
Castlegate	7201	HRS	N 39'00.479 W 109'94.383	hrs.3	1.25	Sr
Castlegate	7192	HRS	N 39'00.479 W 109'94.383	hrs.3	1.2	Fsm
Castlegate	7202	HRS	N 39'00.497 W 109'94.448	hrs.5	0.7	Fsm
Castlegate	7202	HRS	N 39'00.497 W 109'94.448	hrs.5	0.7	Sr
Castlegate	7195	HRS	N 39'00.461 W 109'94.442	hrs.9	0.45	Fsm
Castlegate	7195	HRS	N 39'00.461 W 109'94.442	hrs.9	1.2	Sr
Castlegate	7196	HRS	N 39'00.461 W 109'94.442	hrs.9	0.6	Fsm
Castlegate	7196	HRS	N 39'00.461 W 109'94.442	hrs.9	1.1	Sr
Castlegate	7192	HRS	N 39'00.461 W 109'94.442	hrs.9	1.8	Sr
Morrison	7193	AK	N 38'39.901 W 108'74.673	ac1.1	3	Sp
Morrison	7203	AK	N 38'39.901 W 108'74.673	ac1.1	0.8	Fr
Morrison	7203	AK	N 38'39.901 W 108'74.673	ac1.1	0.7	Fr
Morrison	7204	AK	N 38'39.901 W 108'74.673	ac1.1	0.3	Fsm
Morrison	7204	AK	N 38'39.901 W 108'74.673	ac1.1	0.4	Sd
Morrison	7205	AK	N 38'39.901 W 108'74.673	ac1.1	0.6	Fr
Morrison	7205	AK	N 38'39.901 W 108'74.673	ac1.1	1	Fr
Morrison	7206	AK	N 38'39.901 W 108'74.673	ac1.1	0.15	Fl
Morrison	7206	AK	N 38'39.901 W 108'74.673	ac1.1	0.35	Sr
Morrison	7207	AK	N 38'39.901 W 108'74.673	ac1.1	0.3	Fsm
Morrison	7207	AK	N 38'39.901 W 108'74.673	ac1.1	0.1	Sr
Morrison	7208	AK	N 38'39.901 W 108'74.673	ac1.1	0.2	Fsm
Morrison	7208	AK	N 38'39.901 W 108'74.673	ac1.1	0.3	Sd
Morrison	7209	AK	N 38'39.902 W 108'74.638	ac1.2	16	Sp
Morrison	7209	AK	N 38'39.902 W 108'74.638	ac1.2	0.9	Sp
Morrison	7210	AK	N 38'39.902 W 108'74.638	ac1.2	0.6	Fr
Morrison	7210	AK	N 38'39.902 W 108'74.638	ac1.2	0.4	Fr
Morrison	7211	AK	N 38'39.902 W 108'74.638	ac1.2	2.3	Sp
Morrison	7211	AK	N 38'39.902 W 108'74.638	ac1.2	1.05	Sr
Morrison	7212	AK	N 38'39.902 W 108'74.638	ac1.2	0.05	Fl
Morrison	7213	AK	N 38'39.902 W 108'74.638	ac1.2	0.7	Sr
Morrison	7214	AK	N 38'39.902 W 108'74.638	ac1.2	0.1	Fl
Morrison	7215	AK	N 38'39.902 W 108'74.638	ac1.2	0.2	Fsm
Morrison	7215	AK	N 38'39.902 W 108'74.638	ac1.2	0.5	Sp
Morrison	7167	AK	N 38'39.902 W 108'74.638	ac1.2	0.05	Fl
Morrison	7217	AK	N 38'39.902 W 108'74.638	ac1.2	0.4	Sd
Morrison	7217	AK	N 38'39.902 W 108'74.638	ac1.2	0.1	Fsm
Morrison	7217	AK	N 38'39.902 W 108'74.638	ac1.2	0.4	Sd
Morrison	7218	AK	N 38'39.902 W 108'74.638	ac1.2	0.7	Fr
Morrison	7202	AK	N 38'39.902 W 108'74.638	ac1.2	2	St
Morrison	7219	AK	N 38'39.902 W 108'74.638	ac1.2	0.65	Sp
Morrison	7203	AK	N 38'39.902 W 108'74.638	ac1.2	0.55	Fr
Morrison	7203	AK	N 38'39.902 W 108'74.638	ac1.2	0.5	Fr
Morrison	7203	AK	N 38'39.902 W 108'74.638	ac1.2	0.4	Fr
Morrison	7204	AK	N 38'39.902 W 108'74.638	ac1.2	0.3	Sd
Morrison	7204	AK	N 38'39.902 W 108'74.638	ac1.2	1	Sr
Morrison	7220	AK	N 38'39.902 W 108'74.638	ac1.2	0.6	Fl
Morrison	7221	AK	N 38'39.902 W 108'74.638	ac1.2	0.5	Fsm
Morrison	7221	AK	N 38'39.902 W 108'74.638	ac1.2	0.4	Sd
Morrison	7222	AK	N 38'39.902 W 108'74.638	ac1.2	0.4	Fsm
Morrison	7222	AK	N 38'39.902 W 108'74.638	ac1.2	0.15	Sd
Morrison	7205	AK	N 38'39.902 W 108'74.638	ac1.2	0.25	Fl
Morrison	7206	AK	N 38'39.902 W 108'74.638	ac1.2	0.15	Sd
Morrison	7209	AK	N 38'39.941 W 108'74.628	ac1.3	19	Sp
Morrison	7210	AK	N 38'39.941 W 108'74.628	ac1.3	0.3	Fr
Morrison	7211	AK	N 38'39.941 W 108'74.628	ac1.3	5	Sp
Morrison	7213	AK	N 38'39.941 W 108'74.628	ac1.3	0.7	Fr
Morrison	7213	AK	N 38'39.941 W 108'74.628	ac1.3	0.2	Sd
Morrison	7215	AK	N 38'39.941 W 108'74.628	ac1.3	0.4	Fsm
Morrison	7215	AK	N 38'39.941 W 108'74.628	ac1.3	0.5	Sm
Morrison	7218	AK	N 38'39.920 W 108'75.118	ac2.1	4	Sp
Morrison	7239	AK	N 38'39.920 W 108'75.118	ac2.1	0.1	Fr
Morrison	7239	AK	N 38'39.920 W 108'75.118	ac2.1	0.2	Fl
Morrison	7236	AK	N 38'39.920 W 108'75.118	ac2.1	0.3	Sr
Morrison	7238	AK	N 38'39.920 W 108'75.118	ac2.1	0.1	Fl
Morrison	7237	AK	N 38'39.920 W 108'75.118	ac2.1	0.2	Sd
Morrison	7237	AK	N 38'39.920 W 108'75.118	ac2.1	0.2	Fsm
Morrison	7223	AK	N 38'39.920 W 108'75.118	ac2.1	1.1	Fr
Morrison	7224	AK	N 38'39.920 W 108'75.118	ac2.1	0.3	Sm
Morrison	7225	AK	N 38'39.920 W 108'75.118	ac2.1	0.4	Fl
Morrison	7226	AK	N 38'39.920 W 108'75.118	ac2.1	0.4	Sd
Morrison	7227	AK	N 38'39.906 W 108'75.136	ac2.2	9.5	Sp
Morrison	7228	AK	N 38'39.906 W 108'75.136	ac2.2	0.6	Fl
Morrison	7229	AK	N 38'39.906 W 108'75.136	ac2.2	0.45	Sm
Morrison	7230	AK	N 38'39.906 W 108'75.136	ac2.2	0.15	Fl
Morrison	7231	AK	N 38'39.906 W 108'75.136	ac2.2	1	Sr
Morrison	7232	AK	N 38'39.906 W 108'75.136	ac2.2	0.7	Sm
Morrison	7233	AK	N 38'39.906 W 108'75.136	ac2.2	0.35	Fr
Morrison	7233	AK	N 38'39.906 W 108'75.136	ac2.2	0.5	Fr
Morrison	7234	AK	N 38'39.906 W 108'75.136	ac2.2	0.5	Sd
Morrison	7235	AK	N 38'39.906 W 108'75.136	ac2.2	3	Sp
Morrison	7236	AK	N 38'39.906 W 108'75.136	ac2.2	0.45	Fsm
Morrison	7236	AK	N 38'39.906 W 108'75.136	ac2.2	0.2	Sr
Morrison	7237	AK	N 38'39.906 W 108'75.136	ac2.2	0.6	Fsm
Morrison	7237	AK	N 38'39.906 W 108'75.136	ac2.2	0.2	Sd
Morrison	7238	AK	N 38'39.906 W 108'75.136	ac2.2	0.8	Fr
Morrison	7224	AK	N 38'39.906 W 108'75.136	ac2.2	0.2	Sd
Morrison	7225	AK	N 38'39.906 W 108'75.136	ac2.2	0.2	Fr
Morrison	7225	AK	N 38'39.906 W 108'75.136	ac2.2	0.15	Fr
Morrison	7225	AK	N 38'39.906 W 108'75.136	ac2.2	0.15	Fr
Morrison	7240	AK	N 38'39.906 W 108'75.136	ac2.2	0.3	Sd
Morrison	7227	AK	N 38'39.813 W 108'75.323	ac2.4	6.8	Sp
Morrison	7241	AK	N 38'39.813 W 108'75.323	ac2.4	0.3	Fr
Morrison	7241	AK	N 38'39.813 W 108'75.323	ac2.4	1	Fr
Morrison	7242	AK	N 38'39.813 W 108'75.323	ac2.4	0.8	Sr
Morrison	7243	AK	N 38'39.813 W 108'75.323	ac2.4	0.1	Fl
Morrison	7243	AK	N 38'39.813 W 108'75.323	ac2.4	0.4	Fr
Morrison	7244	AK	N 38'39.813 W 108'75.323	ac2.4	0.9	Sr
Morrison	7245	AK	N 38'39.813 W 108'75.323	ac2.4	0.2	Fr
Morrison	7245	AK	N 38'39.813 W 108'75.323	ac2.4	0.2	Fr
Morrison	7246	AK	N 38'39.813 W 108'75.323	ac2.4	0.7	Sm
Morrison	7247	YC	N 38'84.611 W 109'55.136	yc2	1.5	Fr
Morrison	7248	YC	N 38'84.611 W 109'55.136	yc2	0.7	Sd
Morrison	7249	YC	N 38'84.611 W 109'55.136	yc2	0.6	Fsm
Morrison	7249	YC	N 38'84.611 W 109'55.136	yc2	0.2	Sd
Morrison	7250	YC	N 38'84.611 W 109'55.136	yc2	0.25	Fsm
Morrison	7250	YC	N 38'84.611 W 109'55.136	yc2	0.5	Fsm
Morrison	7250	YC	N 38'84.611 W 109'55.136	yc2	0.5	Sd
Morrison	7251	YC	N 38'84.611 W 109'55.136	yc2	1.7	Fr
Morrison	7252	YC	N 38'84.611 W 109'55.136	yc2	0.8	Sd
Morrison	7253	YC	N 38'84.611 W 109'55.136	yc2	1.7	Fr
Morrison	7254	YC	N 38'84.620 W 109'55.133	yc3	0.8	Sp
Morrison	7254	YC	N 38'84.620 W 109'55.133	yc3	1	Sp
Morrison	7254	YC	N 38'84.620 W 109'55.133	yc3	0.5	Sp
Morrison	7254	YC	N 38'84.620 W 109'55.133	yc3	2.1	Gh
Morrison	7247	YC	N 38'84.620 W 109'55.133	yc3	1.9	Fr
Morrison	7248	YC	N 38'84.620 W 109'55.133	yc3	0.4	Sm
Morrison	7255	YC	N 38'84.620 W 109'55.133	yc3	1.1	Fr
Morrison	7249	YC	N 38'84.620 W 109'55.133	yc3	0.3	Sm
Morrison	7256	YC	N 38'84.620 W 109'55.133	yc3	0.3	Fsm
Morrison	7256	YC	N 38'84.620 W 109'55.133	yc3	0.3	Fsm
Morrison	7257	YC	N 38'84.620 W 109'55.133	yc3	0.3	Sd
Morrison	7258	YC	N 38'84.620 W 109'55.133	yc3	0.1	Fl
Morrison	7259	YC	N 38'84.620 W 109'55.133	yc3	0.4	Sm
Morrison	7260	YC	N 38'84.620 W 109'55.133	yc3	0.3	Fr
Morrison	7250	YC	N 38'84.620 W 109'55.133	yc3	0.3	Sd
Morrison	7253	YC	N 38'84.620 W 109'55.133	yc3	2.7	Fr
Morrison	7249	YC	N 38'84.662 W 109'55.058	yc4	1.2	Fsm
Morrison	7259	YC	N 38'84.662 W 109'55.058	yc4	0.1	Fsm
Morrison	7259	YC	N 38'84.662 W 109'55.058	yc4	0.6	Sd
Morrison	7260	YC	N 38'84.662 W 109'55.058	yc4	0.5	Sd
Morrison	7261	YC	N 38'84.662 W 109'55.058	yc4	0.2	Fsm
Morrison	7261	YC	N 38'84.662 W 109'55.058	yc4	0.4	Sr
Morrison	7262	YC	N 38'84.662 W 109'55.058	yc4	0.5	Fsm
Morrison	7262	YC	N 38'84.662 W 109'55.058	yc4	0.4	Sd
Morrison	7267	YC	N 38'84.662 W 109'55.058	yc4	0.1	Fl
Morrison	7263	YC	N 38'84.662 W 109'55.058	yc4	1.7	Sm
Morrison	7264	YC	N 38'84.662 W 109'55.058	yc4	2.4	Fr
Morrison	7265	YC	N 38'24.691 W 109'54.992	yc5	1.1	Fsm
Morrison	7260	YC	N 38'24.691 W 109'54.992	yc5	0.6	Sr
Morrison	7266	YC	N 38'24.691 W 109'54.992	yc5	0.7	Fsm
Morrison	7262	YC	N 38'24.691 W 109'54.992	yc5	0.7	Sm
Morrison	7267	YC	N 38'24.691 W 109'54.992	yc5	0.3	Fl
Morrison	7263	YC	N 38'24.691 W 109'54.992	yc5	0.2	Sm
Morrison	7263	YC	N 38'24.691 W 109'54.992	yc5	1.4	Sm
Morrison	7264	YC	N 38'24.691 W 109'54.992	yc5	3.6	Fr
Morrison	7268	YC	N 38'84.671 W 109'54.851	yc6	1.5	Sp
Morrison	7269	YC	N 38'84.671 W 109'54.851	yc6	2.4	Gh
Morrison	7270	YC	N 38'84.671 W 109'54.851	yc6	2.4	Sp
Morrison	7271	YC	N 38'84.671 W 109'54.851	yc6	0.2	Fsm
Morrison	7271	YC	N 38'84.671 W 109'54.851	yc6	0.2	Sd
Morrison	7272	YC	N 38'84.671 W 109'54.851	yc6	0.3	Fsm
Morrison	7272	YC	N 38'84.671 W 109'54.851	yc6	0.5	Sd
Morrison	7273	YC	N 38'84.671 W 109'54.851	yc6	1.4	Fsm
Morrison	7274	YC	N 38'84.671 W 109'54.851	yc6	0.5	Sd
Morrison	7275	YC	N 38'84.671 W 109'54.851	yc6	1.7	Fr
Morrison	7276	YC	null	yc7	0.2	Fl
Morrison	7271	YC	null	yc7	0.3	Fsm
Morrison	7271	YC	null	yc7	0.4	Sd
Morrison	7277	YC	null	yc7	0.4	Fsm
Morrison	7272	YC	null	yc7	0.1	Fsm
Morrison	7272	YC	null	yc7	0.3	Sd
Morrison	7273	YC	null	yc7	0.3	Fsm
Morrison	7273	YC	null	yc7	0.7	Sm
Morrison	7277	YC	null	yc7	0.3	Fsm
Morrison	7277	YC	null	yc7	0.2	Sd
Morrison	7275	YC	null	yc7	0.4	Fr
Morrison	7275	YC	null	yc7	0.6	Sd
Morrison	7276	YC	null	yc8	0.4	Fl
Morrison	7271	YC	null	yc8	0.1	Fsm
Morrison	7271	YC	null	yc8	0.3	Sd
Morrison	7277	YC	null	yc8	0.3	Fl
Morrison	7272	YC	null	yc8	0.4	Sd
Morrison	7272	YC	null	yc8	0.5	Sd
Morrison	7273	YC	null	yc8	0.2	Fsm
Morrison	7273	YC	null	yc8	0.7	Sm
Morrison	7279	YC	null	yc8	0.8	Sm
Morrison	7277	YC	null	yc8	0.3	Sd
Morrison	7280	YC	null	yc8	2.8	Fr
Morrison	7281	YC	null	yc9	0.7	Sp
Morrison	7268	YC	null	yc9	2.5	Sp
Morrison	7268	YC	null	yc9	1.5	Gh
Morrison	7271	YC	null	yc9	0.3	Sd
Morrison	7271	YC	null	yc9	0.2	Fsm
Morrison	7271	YC	null	yc9	0.5	Sd
Morrison	7272	YC	null	yc9	0.1	Fsm
Morrison	7272	YC	null	yc9	0.5	Sm
Morrison	7273	YC	null	yc9	1	Fsm
Morrison	7279	YC	null	yc9	0.8	Sd
Morrison	7277	YC	null	yc9	0.1	Fsm
Morrison	7277	YC	null	yc9	0.6	Sd
Morrison	7280	YC	null	yc9	2.9	Fr
Morrison	7262	YC	null	yc10	1.5	Sp
Morrison	7262	YC	null	yc10	2.2	Sp
Morrison	7278	YC	null	yc10	0.2	Fsm
Morrison	7278	YC	null	yc10	0.5	Sp
Morrison	7278	YC	null	yc10	0.4	Gh
Morrison	7282	YC	null	yc10	0.6	Sm
Morrison	7283	YC	null	yc10	0.2	Fsm
Morrison	7283	YC	null	yc10	0.3	Sd
Morrison	7284	YC	null	yc10	0.3	Sd
Morrison	7285	YC	null	yc11	2.6	Sp
Morrison	7262	YC	null	yc11	0.5	Sp
Morrison	7262	YC	null	yc11	0.3	Sp
Morrison	7286	YC	null	yc11	0.2	Fl
Morrison	7287	YC	null	yc11	1	Sp
Morrison	7283	YC	null	yc11	0.4	Fsm
Morrison	7283	YC	null	yc11	0.6	Sd
Morrison	7284	YC	null	yc11	1.8	Sd
Morrison	7284	YC	null	yc11	0.4	Sd
Morrison	7285	YC	null	yc12	1.7	Sp
Morrison	7287	YC	null	yc12	0.2	Fl
Morrison	7262	YC	null	yc12	1.9	Sp
Morrison	7262	YC	null	yc12	0.3	Gh
Morrison	7286	YC	null	yc12	0.3	Fsm
Morrison	7286	YC	null	yc12	0.1	Fsm
Morrison	7286	YC	null	yc12	0.5	Sd
Morrison	7286	YC	null	yc12	0.5	Sd
Morrison	7286	YC	null	yc12	0.5	Sm
Morrison	7288	YC	null	yc12	0.4	Fl
Morrison	7284	YC	null	yc12	0.5	Sr
Morrison	7284	YC	null	yc12	0.9	Sp
Morrison	7289	YC	null	yc12	0.6	Fr
Morrison	7290	YC	null	yc12	1.4	Sm
Morrison	7291	YC	null	yc12	1	Fl
Morrison	7292	YC	null	yc12	0.2	Sd
Morrison	7293	YC	null	yc12	0.8	Fl
Morrison	7294	SR	N 38'84.671 W 109'54.851	sr5	0.6	Fl
Morrison	7295	SR	N 38'84.671 W 109'54.851	sr5	0.15	Sd
Morrison	7296	SR	N 38'84.671 W 109'54.851	sr5	0.6	Fsm
Morrison	7296	SR	N 38'84.671 W 109'54.851	sr5	0.3	Sd
Morrison	7297	SR	N 38'84.671 W 109'54.851	sr5	2.2	Fsm
Morrison	7297	SR	N 38'84.671 W 109'54.851	sr5	0.6	Sr
Morrison	7298	SR	N 38'03.903 W 108'90.157	sr1	0.7	Sm
Morrison	7299	SR	N 38'03.903 W 108'90.157	sr1	0.6	Sd
Morrison	7300	SR	N 38'03.903 W 108'90.157	sr1	0.3	Fl
Morrison	7301	SR	N 38'03.903 W 108'90.157	sr1	0.55	Sr
Morrison	7302	SR	N 38'03.903 W 108'90.157	sr1	0.25	Fl
Morrison	7303	SR	N 38'03.903 W 108'90.157	sr1	0.2	Sd
Morrison	7304	SR	N 38'03.903 W 108'90.157	sr1	1	Fl
Morrison	7304	SR	N 38'03.903 W 108'90.157	sr1	1.2	Fl
Morrison	7305	SR	N 38'03.903 W 108'90.157	sr1	3.3	Sr
Morrison	7306	SR	N 38'03.942 W 108'89.956	sr2	10	Sp
Morrison	7295	SR	N 38'03.942 W 108'89.956	sr2	0.2	Fsm
Morrison	7295	SR	N 38'03.942 W 108'89.956	sr2	0.3	Sd
Morrison	7307	SR	N 38'03.942 W 108'89.956	sr2	0.5	Fl
Morrison	7296	SR	N 38'03.942 W 108'89.956	sr2	0.2	Sd
Morrison	7308	SR	N 38'03.942 W 108'89.956	sr2	0.2	Fl
Morrison	7309	SR	N 38'03.942 W 108'89.956	sr2	0.2	Sd
Morrison	7310	SR	N 38'03.942 W 108'89.956	sr2	1.1	Fr
Morrison	7297	SR	N 38'03.942 W 108'89.956	sr2	0.6	Sd
Morrison	7298	SR	N 38'03.942 W 108'89.956	sr2	0.5	Sd
Morrison	7298	SR	N 38'03.942 W 108'89.956	sr2	0.5	Sr
Morrison	7299	SR	N 38'03.942 W 108'89.956	sr2	0.3	Sd
Morrison	7299	SR	N 38'03.942 W 108'89.956	sr2	0.3	Sm
Morrison	7300	SR	N 38'03.942 W 108'89.956	sr2	0.5	Fl
Morrison	7301	SR	N 38'03.942 W 108'89.956	sr2	0.2	Fsm
Morrison	7301	SR	N 38'03.942 W 108'89.956	sr2	0.7	Sr
Morrison	7304	SR	N 38'03.942 W 108'89.956	sr2	0.7	Fl
Morrison	7305	SR	N 38'03.942 W 108'89.956	sr2	0.2	Sm
Morrison	7306	SR	N 38'03.928 W 108'49.954	sr3	10	Sp
Morrison	7294	SR	N 38'03.928 W 108'49.954	sr3	0.6	Fl
Morrison	7295	SR	N 38'03.928 W 108'49.954	sr3	0.3	Sd
Morrison	7307	SR	N 38'03.928 W 108'49.954	sr3	0.6	Fl
Morrison	7296	SR	N 38'03.928 W 108'49.954	sr3	0.5	Sr
Morrison	7297	SR	N 38'03.928 W 108'49.954	sr3	1.6	Fsm
Morrison	7297	SR	N 38'03.928 W 108'49.954	sr3	0.4	Sm
Morrison	7308	SR	N 38'03.928 W 108'49.954	sr3	0.8	Fl
Morrison	7298	SR	N 38'03.928 W 108'49.954	sr3	0.6	Sr
Morrison	7299	SR	N 38'03.928 W 108'49.954	sr3	0.2	Sm
Morrison	7300	SR	N 38'03.928 W 108'49.954	sr3	0.5	Sm
Morrison	7301	SR	N 38'03.928 W 108'49.954	sr3	0.9	Sm
Morrison	7304	SR	N 38'03.928 W 108'49.954	sr3	0.6	Fl
Morrison	7306	SR	N 38'03.936 W 108'89.935	sr4	10	Sp
Morrison	7294	SR	N 38'03.936 W 108'89.935	sr4	0.55	Fr
Morrison	7295	SR	N 38'03.936 W 108'89.935	sr4	0.2	Sd
Morrison	7307	SR	N 38'03.936 W 108'89.935	sr4	0.4	Fr
Morrison	7296	SR	N 38'03.936 W 108'89.935	sr4	0.9	Sp
Morrison	7297	SR	N 38'03.936 W 108'89.935	sr4	0.5	Sm
Morrison	7308	SR	N 38'03.936 W 108'89.935	sr4	0.4	Fl
Morrison	7298	SR	N 38'03.936 W 108'89.935	sr4	0.6	Sm
Morrison	7309	SR	N 38'03.936 W 108'89.935	sr4	0.4	Fl
Morrison	7299	SR	N 38'03.936 W 108'89.935	sr4	0.4	Sm
Morrison	7310	CNM	N 38'03.936 W 108'89.935	cm4	0.5	Sm
Morrison	7321	CNM	N 39'07.039 W 108'72.849	cm4	0.5	Fr
Morrison	7312	CNM	N 39'07.039 W 108'72.849	cm4	0.4	Sd
Morrison	7312	CNM	N 39'07.039 W 108'72.849	cm4	0.6	Sr
Morrison	7313	CNM	N 39'07.039 W 108'72.849	cm4	0.2	Fl
Morrison	7314	CNM	N 39'07.039 W 108'72.849	cm4	0.2	Sd
Morrison	7314	CNM	N 39'07.039 W 108'72.849	cm4	0.1	Sd
Morrison	7315	CNM	N 39'07.039 W 108'72.849	cm4	0.3	Fsm
Morrison	7315	CNM	N 39'07.039 W 108'72.849	cm4	0.5	Sr
Morrison	7310	CNM	N 39'07.029 W 108'72.860	cm5	1.2	Sm
Morrison	7311	CNM	N 39'07.029 W 108'72.860	cm5	0.2	Fl
Morrison	7312	CNM	N 39'07.029 W 108'72.860	cm5	0.8	Sr
Morrison	7313	CNM	N 39'07.029 W 108'72.860	cm5	0.2	Fl
Morrison	7314	CNM	N 39'07.029 W 108'72.860	cm5	0.5	Sd
Morrison	7315	CNM	N 39'07.029 W 108'72.860	cm5	0.1	Fsm
Morrison	7315	CNM	N 39'07.029 W 108'72.860	cm5	0.5	Sm
Morrison	7316	CNM	N 39'07.022 W 108'72.071	cm6	1	Sm
Morrison	7317	CNM	N 39'07.022 W 108'72.071	cm6	0.6	Fl
Morrison	7318	CNM	N 39'07.022 W 108'72.071	cm6	0.4	Sd
Morrison	7310	CNM	N 39'07.022 W 108'72.071	cm6	2	Fsm
Morrison	7310	CNM	N 39'07.022 W 108'72.071	cm6	0.3	Sd
Morrison	7312	CNM	N 39'07.022 W 108'72.071	cm6	0.8	Fsm
Morrison	7312	CNM	N 39'07.022 W 108'72.071	cm6	0.8	Sr
Morrison	7313	CNM	N 39'07.022 W 108'72.071	cm6	0.15	Fl
Morrison	7314	CNM	N 39'07.022 W 108'72.071	cm6	0.7	Sd
Morrison	7319	CNM	N 39'07.022 W 108'72.071	cm6	0.1	Fl
Morrison	7315	CNM	N 39'07.022 W 108'72.071	cm6	0.6	Sd
Morrison	7316	CNM	N 39'07.018 W 108'72.895	cm7	0.6	Sm
Morrison	7319	CNM	N 39'07.018 W 108'72.895	cm7	0.2	Fl
Morrison	7320	CNM	N 39'07.018 W 108'72.895	cm7	0.1	Sd
Morrison	7318	CNM	N 39'07.018 W 108'72.895	cm7	0.7	Sm
Morrison	7312	CNM	N 39'07.018 W 108'72.895	cm7	1	Fsm
Morrison	7312	CNM	N 39'07.018 W 108'72.895	cm7	1.2	Sr
Morrison	7313	CNM	N 39'07.018 W 108'72.895	cm7	0.2	Fl
Morrison	7314	CNM	N 39'07.018 W 108'72.895	cm7	0.4	Sd
Morrison	7315	CNM	N 39'07.018 W 108'72.895	cm7	0.1	Fsm
Morrison	7315	CNM	N 39'07.018 W 108'72.895	cm7	0.6	Sd
Morrison	7322	NR	N 38'29.470 W 108'66.108	nr2	2.5	Sm
Morrison	7323	NR	N 38'29.470 W 108'66.108	nr2	0.5	Fsm
Morrison	7323	NR	N 38'29.470 W 108'66.108	nr2	0.2	Fsm
Morrison	7323	NR	N 38'29.470 W 108'66.108	nr2	0.4	Sd
Morrison	7324	NR	N 38'29.470 W 108'66.108	nr2	0.2	Fl
Morrison	7325	NR	N 38'29.470 W 108'66.108	nr2	0.3	Sm
Morrison	7326	NR	N 38'29.470 W 108'66.108	nr2	0.2	Fl
Morrison	7327	NR	N 38'29.470 W 108'66.108	nr2	0.1	Sd
Morrison	7328	NR	N 38'29.470 W 108'66.108	nr2	0.6	Fl
Morrison	7329	NR	N 38'29.470 W 108'66.108	nr2	0.4	Sd
Morrison	7322	NR	N 38'29.480 W 108'66.107	nr3	2	Sm
Morrison	7323	NR	N 38'29.480 W 108'66.107	nr3	0.2	Fr
Morrison	7323	NR	N 38'29.480 W 108'66.107	nr3	0.3	Sm
Morrison	7324	NR	N 38'29.480 W 108'66.107	nr3	0.4	Fr
Morrison	7325	NR	N 38'29.480 W 108'66.107	nr3	0.2	Sr
Morrison	7326	NR	N 38'29.480 W 108'66.107	nr3	0.35	Fr
Morrison	7327	NR	N 38'29.480 W 108'66.107	nr3	0.15	Sd
Morrison	7328	NR	N 38'29.480 W 108'66.107	nr3	0.3	Fl
Morrison	7329	NR	N 38'29.480 W 108'66.107	nr3	0.5	Sm
Morrison	7322	NR	N 38'29.496 W 108'66.124	nr4	1.2	Sm
Morrison	7326	NR	N 38'29.496 W 108'66.124	nr4	0.9	Fr
Morrison	7327	NR	N 38'29.496 W 108'66.124	nr4	0.3	Sm
Morrison	7330	NR	N 38'29.496 W 108'66.124	nr4	0.4	Fl
Morrison	7331	NR	N 38'29.496 W 108'66.124	nr4	0.15	Sd
Morrison	7324	NR	N 38'29.496 W 108'66.124	nr4	0.2	Fr
Morrison	7325	NR	N 38'29.496 W 108'66.124	nr4	0.7	Sp
Morrison	7332	NR	N 38'29.496 W 108'66.124	nr4	0.2	Fl
Morrison	7333	NR	N 38'29.496 W 108'66.124	nr4	0.1	Sd
Morrison	7328	NR	N 38'29.496 W 108'66.124	nr4	0.3	Fl
Morrison	7329	NR	N 38'29.496 W 108'66.124	nr4	0.7	Sm
Morrison	7322	NR	N 38'29.422 W 108'66.058	nr5	0.8	Sm
Morrison	7334	NR	N 38'29.422 W 108'66.058	nr5	0.4	Fl
Morrison	7335	NR	N 38'29.422 W 108'66.058	nr5	0.3	Sr
Morrison	7336	NR	N 38'29.408 W 108'66.041	nr6	0.7	Sd
Morrison	7334	NR	N 38'29.408 W 108'66.041	nr6	0.6	Fl
Morrison	7335	NR	N 38'29.408 W 108'66.041	nr6	0.25	Sd
Morrison	7338	NR	N 38'29.393 W 108'66.029	nr8	2.4	Sp
Morrison	7337	NR	N 38'29.393 W 108'66.029	nr8	0.3	Fl
Morrison	7336	NR	N 38'29.393 W 108'66.029	nr8	0.1	Sd
Morrison	7339	NR	N 38'29.393 W 108'66.029	nr8	0.05	Fl
Morrison	7340	NR	N 38'29.393 W 108'66.029	nr8	0.3	Sd
Morrison	7340	NR	N 38'29.393 W 108'66.029	nr8	0.4	Sm
Morrison	7322	NR	null	nr9	1.1	Sm
Morrison	7326	NR	null	nr9	0.1	Fr
Morrison	7326	NR	null	nr9	0.8	Fl
Morrison	7327	NR	null	nr9	0.2	Sd
Morrison	7327	NR	null	nr9	0.3	Sm
Morrison	7331	NR	null	nr9	0.3	Fsm
Morrison	7331	NR	null	nr9	0.5	Sd
Morrison	7325	NR	null	nr9	0.2	Sd
Morrison	7327	NR	null	nr10	0.8	Sr
Morrison	7330	NR	null	nr10	0.05	Fr
Morrison	7330	NR	null	nr10	0.4	Fl
Morrison	7331	NR	null	nr10	0.15	Sd
Morrison	7325	NR	null	nr10	0.25	Fsm
Morrison	7325	NR	null	nr10	0.5	Sr
Morrison	7333	NR	null	nr10	0.4	Fsm
Morrison	7333	NR	null	nr10	0.3	Fsm
Morrison	7333	NR	null	nr10	0.5	Sd

## Sheet: Length and width vs thickness
Formation	Element type	Location	ID	Thickness	Apparent_width	Partial_width	Partial_length	Unltd_length	notes
Neslen	CS	CC3	7118	3.6	NULL	NULL	110	NULL	NULL
Neslen	CS	CC3	7119	1.7	NULL	NULL	110	NULL	NULL
Neslen	CS	CC3	7120	1	NULL	NULL	110	NULL	NULL
Neslen	CS	CC3	7121	1.7	NULL	NULL	110	NULL	NULL
Neslen	FF	CC3	7122	0.7	NULL	60	NULL	NULL	NULL
Neslen	CS	CC3	7123	2.5	NULL	NULL	NULL	1495	NULL
Neslen	FF	CC3	7124	0.7	NULL	60	NULL	NULL	NULL
Neslen	CS	CC3	7125	1.9	NULL	NULL	110	NULL	NULL
Neslen	CS	CC3	7126	1.4	NULL	NULL	110	NULL	NULL
Neslen	CS	CC3	7127	2.1	NULL	NULL	NULL	560	NULL
Neslen	FF	CC3	7128	0.6	NULL	50	NULL	NULL	NULL
Neslen	CS	CC3	7129	1.5	NULL	NULL	NULL	525	NULL
Neslen	FF	CC3	7130	0.7	NULL	120	NULL	NULL	NULL
Neslen	CS	CC3	7131	1.5	NULL	NULL	NULL	NULL	NULL
Neslen	AC	CC3	7132	2	NULL	280	NULL	NULL	NULL
Neslen	CS	CC3	7133	1.8	NULL	NULL	NULL	NULL	NULL
Neslen	CS	CC3	7134	0.4	NULL	NULL	NULL	160	NULL
Neslen	CS	CC3	7135	0.6	NULL	NULL	NULL	160	NULL
Neslen	CS	CC3	7136	0.5	NULL	NULL	NULL	160	NULL
Neslen	CS	CC3	7137	0.3	NULL	NULL	NULL	160	NULL
Neslen	CS	CC3	7138	0.2	NULL	NULL	NULL	160	NULL
Neslen	CS	CC3	7139	0.5	NULL	NULL	NULL	160	NULL
Neslen	CS	CC3	7140	0.4	NULL	NULL	NULL	160	NULL
Neslen	CS	CC3	7141	0.5	NULL	NULL	NULL	160	NULL
Neslen	CS	CC3	7142	0.9	NULL	NULL	NULL	160	NULL
Neslen	CS	CC3	7143	2.2	NULL	NULL	NULL	782	NULL
Neslen	CS	CC3	7144	1.3	NULL	NULL	NULL	2266	NULL
Neslen	CS	CC3	7145	0.7	NULL	NULL	170	NULL	NULL
Neslen	CS	CC3	7146	1.1	NULL	NULL	170	NULL	NULL
Neslen	CS	CC3	7147	1.1	NULL	NULL	170	NULL	NULL
Neslen	CS	CC3	7148	0.5	NULL	NULL	100	NULL	NULL
Neslen	CH	CC3	7149	8	NULL	NULL	280	NULL	NULL
Neslen	FF	CC3	7150	0.6	NULL	70	NULL	NULL	NULL
Neslen	FF	CC3	7151	0.6	NULL	70	NULL	NULL	NULL
Neslen	CH	CC3	7152	6	NULL	280	NULL	NULL	NULL
Neslen	C	TSR1	7153	1.9	NULL	NULL	NULL	NULL	NULL
Neslen	CS	TSR1	7154	2.4	1495	NULL	NULL	NULL	NULL
Neslen	CS	TSR1	7155	2.7	1502	NULL	NULL	NULL	NULL
Neslen	CS	TSR1	7156	3.5	NULL	NULL	151	NULL	NULL
Neslen	CS	TSR1	7157	3	NULL	NULL	NULL	292	NULL
Neslen	FF	TSR1	7158	0.3	NULL	NULL	NULL	NULL	NULL
Neslen	CS	TSR1	7159	3	1447	NULL	NULL	NULL	NULL
Neslen	FF	TSR1	7160	1.5	79	NULL	NULL	NULL	NULL
Neslen	CS	TSR1	7161	2.4	NULL	NULL	389	NULL	NULL
Neslen	CH	TSR1	7162	4	NULL	NULL	186	NULL	NULL
Neslen	CS	TSR1	7163	1.5	NULL	NULL	151	NULL	NULL
Neslen	FF	TSR1	7164	1.95	NULL	NULL	151	NULL	NULL
Neslen	CS	TSR1	7165	0.3	NULL	NULL	58	NULL	NULL
Neslen	FF	TSR1	7166	0.4	NULL	44	NULL	NULL	NULL
Neslen	FF	TSR1	7167	0.05	NULL	NULL	NULL	NULL	NULL
Neslen	FF	TSR1	7168	0.8	NULL	72	NULL	NULL	NULL
Neslen	CH	TSR1	7169	5.65	NULL	NULL	NULL	NULL	NULL
Neslen	FF	TSR1	7170	0.5	NULL	72	NULL	NULL	NULL
Neslen	CS	TSR1	7171	1	NULL	NULL	295	NULL	NULL
Neslen	CS	TSR1	7172	2.3	1095	NULL	NULL	NULL	NULL
Neslen	CS	TSR1	7173	2.1	NULL	NULL	NULL	585	NULL
Neslen	FF	TSR1	7174	0.6	NULL	156	NULL	NULL	NULL
Neslen	CH	TSR1	7175	7.9	NULL	325	NULL	NULL	NULL
Neslen	CH	TSR1	7176	5.5	NULL	325	NULL	NULL	NULL
Neslen	CS	CC4	7177	1.7	NULL	NULL	250	NULL	NULL
Neslen	CS	CC4	7178	2.1	NULL	NULL	NULL	750	NULL
Castlegate	FF	HRS	7179	0.25	NULL	NULL	NULL	NULL	NULL
Castlegate	CH	HRS	7180	4.7	NULL	120	NULL	NULL	NULL
Castlegate	CS	HRS	7181	1	NULL	NULL	290	NULL	NULL
Castlegate	CS	HRS	7182	1.6	NULL	NULL	70	NULL	NULL
Castlegate	FF	HRS	7183	0.7	NULL	NULL	70	NULL	NULL
Castlegate	CS	HRS	7184	1.4	NULL	NULL	NULL	700	NULL
Castlegate	CH	HRS	7185	9.1	NULL	125	NULL	NULL	NULL
Castlegate	CR	HRS	7186	0.6	6	NULL	NULL	NULL	NULL
Castlegate	CS	HRS	7187	2	NULL	NULL	290	NULL	NULL
Castlegate	FF	HRS	7188	0.2	NULL	240	NULL	NULL	Pedogenized
Castlegate	CS	HRS	7189	2.6	NULL	NULL	NULL	405	NULL
Castlegate	FF	HRS	7190	0.4	NULL	90	NULL	NULL	Pedogenized
Castlegate	FF	FLY	7191	1.6	NULL	100	NULL	NULL	NULL
Castlegate	CH	FLY	7192	5	NULL	NULL	NULL	700	NULL
Castlegate	CR	FLY	7193	2	NULL	NULL	NULL	NULL	NULL
Castlegate	FF	FLY	7194	0.4	NULL	40	NULL	NULL	NULL
Castlegate	CS	FLY	7195	1.7	NULL	NULL	115	NULL	NULL
Castlegate	CS	FLY	7196	2.2	NULL	NULL	40	NULL	NULL
Castlegate	CS	FLY	7197	2.7	300	NULL	NULL	NULL	NULL
Castlegate	FF	FLY	7198	0.5	NULL	40	NULL	NULL	NULL
Castlegate	FF	FLY	7199	1.3	NULL	40	NULL	NULL	NULL
Castlegate	CS	FLY	7200	0.6	NULL	NULL	40	NULL	NULL
Castlegate	CH	FLY	7201	4.15	NULL	100	NULL	NULL	NULL
Castlegate	CS	FLY	7202	1.8	NULL	NULL	40	NULL	NULL
Morrison	FF	AK	7203	1.5	NULL	45	NULL	NULL	Pedogenized
Morrison	CS	AK	7204	1.3	NULL	NULL	54	NULL	NULL
Morrison	FF	AK	7205	1.6	NULL	45	NULL	NULL	Pedogenized
Morrison	FF	AK	7206	0.15	NULL	NULL	45	NULL	NULL
Morrison	CS	AK	7207	0.4	NULL	NULL	45	NULL	NULL
Morrison	CS	AK	7208	0.5	NULL	NULL	80	NULL	NULL
Morrison	CH	AK	7209	19	NULL	367	NULL	NULL	NULL
Morrison	FF	AK	7210	1	NULL	29	NULL	NULL	Pedogenized
Morrison	CR	AK	7211	5	NULL	30	NULL	NULL	NULL
Morrison	FF	AK	7212	0.05	NULL	45	NULL	NULL	NULL
Morrison	CS	AK	7213	0.9	NULL	NULL	45	NULL	NULL
Morrison	FF	AK	7214	0.1	NULL	45	NULL	NULL	NULL
Morrison	CS	AK	7215	0.9	NULL	45	NULL	NULL	NULL
Morrison	CR	AK	7216	4	NULL	NULL	122	NULL	NULL
Morrison	FF	AK	7217	0.3	NULL	122	NULL	NULL	NULL
Morrison	CS	AK	7218	1.4	NULL	29	NULL	NULL	NULL
Morrison	CR	AK	7219	2.65	NULL	NULL	NULL	NULL	NULL
Morrison	FF	AK	7220	0.6	NULL	29	NULL	NULL	NULL
Morrison	CS	AK	7221	0.9	NULL	NULL	29	NULL	NULL
Morrison	CS	AK	7222	0.55	NULL	NULL	29	NULL	NULL
Morrison	FF	AK	7223	1.1	NULL	47	NULL	NULL	Pedogenized
Morrison	CS	AK	7224	0.3	NULL	NULL	141	NULL	NULL
Morrison	FF	AK	7225	0.5	NULL	47	NULL	NULL	Pedogenized
Morrison	FF	AK	7226	0.4	NULL	47	NULL	NULL	NULL
Morrison	CH	AK	7227	9.5	NULL	NULL	367	NULL	NULL
Morrison	FF	AK	7228	0.6	NULL	NULL	NULL	NULL	NULL
Morrison	CS	AK	7229	0.45	NULL	NULL	NULL	NULL	NULL
Morrison	FF	AK	7230	0.15	NULL	NULL	NULL	NULL	NULL
Morrison	CS	AK	7231	1	NULL	NULL	NULL	NULL	NULL
Morrison	CS	AK	7232	0.7	NULL	NULL	NULL	NULL	NULL
Morrison	FF	AK	7233	0.55	NULL	NULL	NULL	NULL	NULL
Morrison	CS	AK	7234	0.5	NULL	NULL	75	NULL	NULL
Morrison	CR	AK	7235	3	NULL	NULL	NULL	NULL	NULL
Morrison	CS	AK	7236	0.65	NULL	NULL	305	NULL	NULL
Morrison	CS	AK	7237	0.8	NULL	NULL	94	NULL	NULL
Morrison	NULL	AK	7238	NULL	NULL	NULL	NULL	NULL	NULL
Morrison	NULL	AK	7239	NULL	NULL	NULL	NULL	NULL	NULL
Morrison	CS	AK	7240	0.3	NULL	NULL	188	NULL	NULL
Morrison	FF	AK	7241	1.3	NULL	48	NULL	NULL	Pedogenized
Morrison	CS	AK	7242	0.8	NULL	NULL	NULL	NULL	NULL
Morrison	FF	AK	7243	0.5	NULL	NULL	NULL	NULL	Pedogenized
Morrison	CS	AK	7244	0.9	NULL	NULL	NULL	NULL	NULL
Morrison	FF	AK	7245	0.4	NULL	NULL	NULL	NULL	Pedogenized
Morrison	CS	AK	7246	0.7	NULL	NULL	NULL	NULL	NULL
Morrison	FF	AK	7247	1.9	NULL	NULL	NULL	NULL	Pedogenized
Morrison	CS	YC	7248	0.7	NULL	NULL	25	NULL	NULL
Morrison	CS	YC	7249	0.8	NULL	NULL	105	NULL	NULL
Morrison	CS	YC	7250	1.25	NULL	NULL	25	NULL	NULL
Morrison	FF	YC	7251	1.7	NULL	NULL	NULL	NULL	Pedogenized
Morrison	CS	YC	7252	0.8	NULL	NULL	40	NULL	NULL
Morrison	FF	YC	7253	1.7	NULL	NULL	NULL	NULL	Pedogenized
Morrison	CH	YC	7254	4.4	NULL	NULL	NULL	NULL	NULL
Morrison	FF	YC	7255	1.1	NULL	NULL	NULL	NULL	Pedogenized
Morrison	CS	YC	7256	0.6	NULL	NULL	NULL	NULL	NULL
Morrison	CS	YC	7257	0.3	NULL	NULL	25	NULL	NULL
Morrison	FF	YC	7258	0.1	NULL	80	NULL	NULL	NULL
Morrison	CS	YC	7259	0.7	NULL	NULL	80	NULL	NULL
Morrison	CS	YC	7260	0.5	NULL	NULL	95	NULL	NULL
Morrison	CS	YC	7261	0.6	NULL	NULL	NULL	NULL	NULL
Morrison	CS	YC	7262	2.2	NULL	NULL	197	NULL	NULL
Morrison	CS	YC	7263	1.7	NULL	NULL	95	NULL	NULL
Morrison	FF	YC	7264	2.4	NULL	NULL	NULL	NULL	Pedogenized
Morrison	FF	YC	7265	1.1	NULL	100	NULL	NULL	NULL
Morrison	CS	YC	7266	1.4	NULL	NULL	NULL	NULL	NULL
Morrison	FF	YC	7267	0.3	NULL	NULL	NULL	NULL	NULL
Morrison	CH	YC	7268	1.5	NULL	75	NULL	NULL	NULL
Morrison	CH	YC	7269	2.4	NULL	NULL	75	NULL	NULL
Morrison	CH	YC	7270	2.4	NULL	NULL	NULL	NULL	NULL
Morrison	CS	YC	7271	0.7	NULL	NULL	220	NULL	NULL
Morrison	CS	YC	7272	0.9	NULL	NULL	206	NULL	NULL
Morrison	CS	YC	7273	1.4	NULL	NULL	206	NULL	NULL
Morrison	CS	YC	7274	0.5	NULL	NULL	206	NULL	NULL
Morrison	FF	YC	7275	1.7	NULL	NULL	75	NULL	Pedogenized
Morrison	FF	YC	7276	0.4	NULL	NULL	NULL	NULL	NULL
Morrison	CS	YC	7277	0.8	NULL	NULL	NULL	NULL	NULL
Morrison	CS	YC	7278	1.1	NULL	60	NULL	NULL	NULL
Morrison	CS	YC	7279	0.8	NULL	NULL	45	NULL	NULL
Morrison	FF	YC	7280	2.8	NULL	45	NULL	NULL	Pedogenized
Morrison	CS	YC	7281	0.7	NULL	30	NULL	NULL	NULL
Morrison	CH	YC	7282	4	NULL	NULL	NULL	NULL	NULL
Morrison	CS	YC	7283	1	NULL	NULL	115	NULL	NULL
Morrison	CS	YC	7284	2.2	NULL	NULL	133	NULL	NULL
Morrison	CH	YC	7285	1.7	NULL	50	NULL	NULL	NULL
Morrison	CS	YC	7286	1.2	NULL	NULL	NULL	NULL	NULL
Morrison	FF	YC	7287	0.2	NULL	NULL	165	NULL	NULL
Morrison	FF	YC	7288	0.4	NULL	NULL	NULL	NULL	NULL
Morrison	FF	YC	7289	0.6	NULL	NULL	NULL	NULL	Pedogenized
Morrison	CS	YC	7290	1.4	NULL	NULL	NULL	NULL	NULL
Morrison	FF	YC	7291	1	NULL	NULL	NULL	NULL	NULL
Morrison	NULL	YC	7292	NULL	NULL	NULL	NULL	NULL	NULL
Morrison	FF	YC	7293	0.8	NULL	NULL	NULL	NULL	NULL
Morrison	FF	SR	7294	0.6	NULL	31	NULL	NULL	NULL
Morrison	CS	SR	7295	0.15	NULL	NULL	82	NULL	NULL
Morrison	CS	SR	7296	0.9	NULL	NULL	30	NULL	NULL
Morrison	CS	SR	7297	2.2	NULL	NULL	59	NULL	NULL
Morrison	CS	SR	7298	1	NULL	NULL	85	NULL	NULL
Morrison	CS	SR	7299	0.6	NULL	NULL	59	NULL	NULL
Morrison	FF	SR	7300	0.5	NULL	25	NULL	NULL	NULL
Morrison	CS	SR	7301	0.9	NULL	NULL	59	NULL	NULL
Morrison	FF	SR	7302	0.25	NULL	NULL	NULL	NULL	NULL
Morrison	CS	SR	7303	0.2	NULL	NULL	NULL	NULL	NULL
Morrison	FF	SR	7304	2.2	NULL	NULL	NULL	NULL	NULL
Morrison	CS	SR	7305	3.3	NULL	NULL	NULL	NULL	NULL
Morrison	CH	SR	7306	10	NULL	200	NULL	NULL	NULL
Morrison	FF	SR	7307	0.6	NULL	49	NULL	NULL	NULL
Morrison	FF	SR	7308	0.2	NULL	NULL	NULL	NULL	NULL
Morrison	CS	SR	7309	0.2	NULL	NULL	NULL	NULL	NULL
Morrison	FF	SR	7310	1.1	NULL	20	NULL	NULL	Pedogenized
Morrison	CS	SR	7311	0.6	NULL	NULL	59	NULL	NULL
Morrison	CS	CNM	7312	0.8	NULL	NULL	NULL	NULL	NULL
Morrison	FF	CNM	7313	0.2	NULL	NULL	NULL	NULL	NULL
Morrison	CS	CNM	7314	0.7	NULL	NULL	96	NULL	NULL
Morrison	CS	CNM	7315	0.6	NULL	NULL	254	NULL	NULL
Morrison	CS	CNM	7316	1	NULL	NULL	22	NULL	NULL
Morrison	FF	CNM	7317	0.6	NULL	22	NULL	NULL	NULL
Morrison	CS	CNM	7318	0.7	NULL	NULL	NULL	22	NULL
Morrison	FF	CNM	7319	0.2	NULL	31	NULL	NULL	NULL
Morrison	CS	CNM	7320	0.1	NULL	NULL	NULL	31	NULL
Morrison	FF	CNM	7321	0.5	NULL	NULL	NULL	NULL	Pedogenized
Morrison	CH	NR	7322	2.5	NULL	86	NULL	NULL	NULL
Morrison	CS	NR	7323	1.1	NULL	216	NULL	NULL	NULL
Morrison	FF	NR	7324	0.2	NULL	37	NULL	NULL	NULL
Morrison	CS	NR	7325	0.7	NULL	108	NULL	NULL	NULL
Morrison	CS	NR	7326	0.35	NULL	NULL	NULL	NULL	NULL
Morrison	CS	NR	7327	0.5	NULL	268	NULL	NULL	NULL
Morrison	FF	NR	7328	0.3	NULL	37	NULL	NULL	NULL
Morrison	CS	NR	7329	0.7	NULL	121	NULL	NULL	NULL
Morrison	FF	NR	7330	0.45	NULL	149	NULL	NULL	NULL
Morrison	CS	NR	7331	0.8	NULL	NULL	324	NULL	NULL
Morrison	NULL	NR	7332	NULL	NULL	NULL	NULL	NULL	NULL
Morrison	CS	NR	7333	1.2	NULL	NULL	NULL	NULL	NULL
Morrison	FF	NR	7334	0.6	NULL	70	NULL	NULL	NULL
Morrison	CS	NR	7335	0.25	NULL	NULL	NULL	70	NULL
Morrison	CS	NR	7336	0.1	NULL	NULL	NULL	22	NULL
Morrison	FF	NR	7337	0.3	NULL	22	NULL	NULL	NULL
Morrison	CH	NR	7338	2.4	NULL	10	NULL	NULL	NULL
Morrison	FF	NR	7339	0.05	NULL	NULL	NULL	NULL	NULL

## Sheet: Modern data and co-ordinates
River	GPS	splay no	Width of parent channel(At point of breakout)	width of splay	length of splay	Crevasse-channel network	Planform geometry	Amalgamation? i.e with other adjacent splay elements
Helodrano Mahajambe	S 15'44'48.62'' E 46'57'3.80''	101	98.5	1096	917	no	irregular	yes
	S 15'45'2.08'' E 46'56'46.60''	102	108	538.95	877	no	irregular	yes
	S 15'44'15.64'' E 46'56'42.10''	103	87	1202	530	vague beginnings	irregular	yes
	S 15'45'13.17'' E 46'57'6.24''	104	108	1062	476	no	irregular	no
	S 15'45'14.45'' E 46'56'23.56''	105	54	337	630	vague beginnings	elongate	yes
	S 15'45'29.94'' E 46'57'42.28''	106	74	840	796	yes	elongate	no
	S 15'42'40.79'' E 46'57'41.41''	107	106	2179	850	yes	elongate	no
Madagascar	S 15'41'37.50'' E 46'58'10.50''	401	147	778	665	yes	lobate	no
	S 15'41'53.77'' E 46'59'15.86''	402	194	1306	1537	yes	lobate	yes
	S 15'41'13.49'' E46'58'10.70''	404	147	765	991	yes	lobate	yes
	S 15'41'24.39'' E 46'58'38.17''	405	178	971	1062	yes	lobate	yes
	S 15'41'32.35'' E 46'59'12.76''	406	175	786	561	yes	lobate	yes
	S 15'40'59.76'' E 46'59'16.68''	407	166	1023	626	yes	lobate	yes
	S 15'40'33.57'' E 46'59'19.37''	408	166	919	1284	yes	lobate	yes
	S 15'41'3.00 E 46'59'41.44''	410	255	998	1243	yes	lobate	yes
	S 15'39'35.75 E 46'59'59.70''	411	217	1070	982	yes	lobate	yes
	S 15'39'37.53'' E 46'59'48.82''	412	226	566	601	yes	lobate	yes
	S 15'40'32.24'' E 46'59'46.94''	413	220	1645	1125	yes	lobate	yes
Paraná
	S 28'41'34.28'' W 59'4'49.57''	228	2153	207	562	yes	elongate	no
	S 28'41'9.63'' W 59'4'33.99''	230	2256	405	687	yes	elongate-lobate	no
	S 28'40'33.19'' W 59'4'7.51''	231	2651	242	408	no	elongate	no
	S 28'38'31.70'' W 59'3'39.16''	236	345	218	358	yes	elongate	yes
	S 28'38'5.73'' W 59'3'28.83''	237	108	216	288	yes	elongate	yes
	S 28'37'48.37'' W 59'3'30.26''	238	60	207	613	yes	elongate	no
	S 28'37;31.05'' W 59'3'38.19 ''	239	648	942	1336	yes	elongate	yes
	S 28'39'12.88'' W 59'3'29.69''	233	344	216	601	no	elongate	no
	S 28'35'2.30'' W 59'3'41.96''	242	324	482	3574	yes	elongate	yes
	S 28'53'16.57'' W 59'9'24.00''	243	1793	305	971	yes	elongate	no
	S 27'46'54.74'' W 58'47'47.36''	255	2149	703	1679	yes	elongate	no
	S 27'17'37.60'' W 57'58'33.54''	259	4392	220	388	no	elongate	no
	S 28'50'39.86'' W 59'7'27.18''	201	150	926	1090	yes	lobate	yes
	S 28'49'41.84'' W 59'7'6.31''	202	115	1190	576	yes	lobate	yes
	S 28'47'24.49'' W 59'6'52.94	205	56.8	269	330	yes	lobate	yes
	S 29'46'35.12'' W 59'7'2.15''	207	185	152	163	yes	lobate	yes
	S 28'46'24.37'' W 59'7'5.35''	208	140	237	276	yes	lobate	yes
	S 28'46'18.58'' W 59'7'6.58''	209	301	97	178	no	lobate	yes
	S 28'46'13.32'' W 59'7'7.75''	210	295	156	257	yes	lobate	yes
	S 28'46'6.38'' W 59'7'10.39''	211	354	185	216	yes	lobate	yes
	S 28'45'58.04'' W 59'7'12.71''	212	2187	330	644	yes	lobate	yes
	S 28'45'14.60'' W 59'7'17.22''	214	1533	110	133	no	lobate	yes
	S 28'45'50.24'' W 59'7'15.06''	215	2038	115	82	yes	lobate	yes
	S 28'45'46.61'' W 59'7'16.34''	216	1770	73	51	yes	lobate	yes
	S 28'45'2.85'' W 59'7'14.97''	217	1367	129	169	yes	lobate	yes
	S 28'44'57.23 W 59'7'10.27''	218	1516	169	132	no	lobate	yes
	S 28'44'50.61'' W 59'7'6.93''	219	1490	286	214	yes	lobate	yes
	S 298'44'26.18'' W 59'6'43.82''	222	2222	159	260	yes	lobate	no
	S 28'44'7.52'' W 59'6'31.16''	223	1944	547	345	yes	lobate	yes
	S 28'43'35.31'' W 59'6'5.99''	224	1682	245	248	no	lobate	yes
	S 28'43'26.03'' W 59'6'2.88''	225	1649	218	160	no	lobate	yes
	S 28'41'51.62'' W 59'5'17.54''	226	1684	192	243	yes	lobate	no
	S 28'41'44.10'' W 59'5'6.00''	227	1927	174	270	yes	lobate	no
	S 28'41'26.83'' W 59'4'45.76''	229	2179	110	246	no	lobate	no
	S 28'35'54.71'' W 59'3'45.13''	241	391	1016	938	yes	lobate	yes
	S 28'53'33.89'' W 59'9'32.69''	244	1704	500	1375	yes	lobate	no
	S 28'53'56.95'' W 59'9'43.87''	245	2062	113	99	yes	lobate	no
	S 28'55'19.83'' W 59'10'11.58''	248	2055	187	185	yes	lobate	no
	S 28'55'41.35'' W 59'10'13.90''	249	2280	74	171	yes	lobate	no
	S 27'56'19.65'' W 58'48'36.95''	251	709	142	262	yes	lobate	yes
	S 27'56'12.74'' W 58'48'33.30''	252	723	222	432	yes	lobate	yes
	S 27'55'46.88'' W 58'48'33.24''	253	834	1070	991	yes	lobate	no
	S 27'17'3.73'' W 57'59'4.98''	256	3554	387	338	yes	lobate	no
	S 27'17'21.75'' W 57'58'49.67''	257	3808	356	493	yes	lobate	yes
	S 27'17'31.92'' W 57'58'41.90''	258	3879	200	243	no	lobate/irregular	yes
	S 27'17'58.90'' W 57'57'48.88''	260	4732	161	155		lobate	no
	S 28'46'9.33'' W 59'7'9.07''	261	355	92	156		lobate	yes
	S 28'48'47.50'' W 59'6'48.63''	203	271	1167	1085	yes	irregular	yes
	S 28'47'54.46'' W 59'6'54.76''	204	178	691	1205	yes	irregular	yes
	S 28'46'48.21'' W 59'7'3.76''	206	178	982	1168	yes	irregular	yes
	S 28'45'14.11'' W 59'7'15.59''	213	1389	460	388	yes	irregular	yes
	S 28'44'43.64'' W 59'6'55.58''	220	1705	388	543	yes	irregular-lobate	yes
	S 28'44'38.66'' W 59'6'53.10''	221	1760	288	554	yes	irregular	yes
	S 29'40'20.85'' W 59'3'58.81''	232	455	191	245	no	irregular	no
	S 28'38'56.40'' W 59'3'30.27''	234	340	491	301	no	irregular	no
	S 28'38'44.56'' W 59'3'28.28''	235	321	242	493	yes	irregular	yes
	S 28'36'35.02'' W 59'3'39.81''	240	309	685	493	yes	irregular	yes
	S 28'54'37.94'' W 59'9'53.57''	246	2203	638	1847	yes	irregular	no
	S 28'54'57.84'' W 59'9'59.07''	247	2072	495	775	yes	irregular	no
	S 28'56'43.52'' W 59'9'47.50''	250	4257	248	866	yes	irregular	no
	S 27'48'22.97'' W 58'47'57.69''	254	2005	361	358	no	irregular	no
Saskatchewan	N 53'29'5.81'' W 100'37'15.82''	301	189	1494	1345	yes	lobate	no
	N 53'28'9.55'' W 100'35'58.16''	302	200	1625	1458	yes	lobate	no
	N 53'38'43.66'' W 100'59'50.39''	303	295	1681	1978	yes	lobate	no
Niobrara	N 42'45'40.98'' W 98'2'59.91''	403	142	657	2176	yes	elongate	yes
	N 42'45'39.52'' W 98'0'31.39''	409	216	1237	1916	yes	elongate	yes
Saloum	N 14'4'31.67'' W 16'11'18.56''	601	91	1498	923	yes	irregular	yes
	N 14'4'42.86'' W 16'11'40.78''	602	63	462	660	yes	irregular	yes
	N 14'7'26.38'' W 16'12'2.07''	606	95	868	878	yes	iregular	yes
	N 14'6'39.57'' W 16'11'42.85''	608	96	521	481	yes	irregular	yes
	N 14'10'10.19'' W 16'10'9.20''	614	299	2087	1043	yes	irregular sheet	no
	N14'5'54.94'' W 16'1'54.58''	616	206	179	180	yes	irregular	no
	N 14'8'52.71'' W 16'2'7.87''	619	262	1246	1000	yes	iregular	yes
	N 14'5'1.06'' W 16'11'42.30''	603	46	150	448	yes	elongate	no
	N 14'5'57.89'' W 17'11'35.21''	605	167	355	1323	yes	elongate	yes
	N 14'8'39.15'' W 16'9'53.02''	607	201	822	2292	yes	elongate	no
	N 14'6'46.02'' W 16'10'51.17''	610	71	297	419	yes	elongate	yes
	N 14'6'52.62'' W 16'9'31.85''	612	154	1439	1557	yes	elongate irregular	yes
	N 14'6'42.45'' W 16'9'40.03''	613	79	567	906	yes	elongate	yes
	N 14'6'7.34'' W 16'2'14'37''	615	264	386	898	yes	elongate	no
	N 14'5'55.47'' W 16'1'19.49''	617	219	149	324	yes	elongate	no
	N 14'8'29.13'' W 16'0'43.91''	620	260	639	1360	yes	elongate	yes
	N 14'8'11.79'' W 16'3'9.24''	621	191	1051	2041	yes	elongate	yes
	N 14'5'35.58'' W 16'11'44.97''	604	80	657	634	yes	sheet	yes
	N 14'6'56.87'' W 16'10'46.46''	609	70	404	346	yes	lobate	yes
	N 14'6'30.88'' W 16'9'11.46''	611	67	729	864	yes	lobate irregular	yes
	N 14'6'0.04'' W 16'0'42.86''	618	296	387	698	yes	lobate	no
Mississippi	N 29'10'52.95'' W 89'13'25.96''	701	78	635	641	yes	lobate	yes
	N 29'10'54.72'' W 89'14'7.50''	703	58	1272	1099	yes	lobate	yes
	N 29'12'33.37'' W 89'13'40.84''	704	379	1534	967	yes	lobate	yes
	N 29'12'44.93'' W 89'13'1.11''	705	176	626	708	yes	lobate	yes
	N 29'12'34.27'' W 89'13'4.54''	706	163	656	741	yes	lobate	yes
	N 29'11'46.60'' W 89'13'53.76''	708	253	2252	2650	yes	lobate	yes
	N 29'6'21.24'' W 89'14'4.82''	710	409	1560	1816	yes	lobate	yes
	N 29'7'18.43'' W 89'14'12.79''	711	547	959	1395	yes	lobate	yes
Rhine	N 29'10'46.41'' W 89'12'50.86''	702	59	501	1076	yes	elongate	yes
	N 29'12'40.49'' W 89'12'42.08''	707	216	690	1078	yes	elongate	yes
East Madagascar Ankofia	S 15'42'4.66'' E 47'4'34.20''	901	105	1402	1107	yes	lobate-irregular	no
	S 15'43'15.30'' E 47'5'50.24''	902	275	1342	1258	vague beginnings	lobate	no
	S 15'41'17.08'' E 47'5'15.17''	903	174	1086	829	vague beginnings	lobate	no
	S 15'42'55.38'' E 47'4'7.92''	904	100	2137	1608	yes	lobate	no
	S 15'27'1.30'' E 47'25'41.20''	906	309	1235	1193	yes	lobate	no
	S 15'24'53.35'' E 47'18'17.43''	905	312	1222	2915	yes	elongate	no
